# Supplementary material for: Tunable assembly of host–guest colloidal crystals
Source: Royal Society of Chemistry journal article supplement (doi:10.1039/d3sm00891f), 2023-01-01
Supplement: d3sm00891f1.pdf [file d3sm00891f1.pdf]

Dear Professor Kumar,

Please find the supplementary movies for the manuscript entitled "Tunable Assembly of Host–Guest Colloidal Crystals" in the following link: <https://www.dropbox.com/sh/w1uc3ivritgfoeq/AAD-1p2He6B8GmTecZUdPj4ca?dl=0>.

Sincerely,  
Timothy C. Moore
