# Supplementary material for: Tunable assembly of host–guest colloidal crystals
Source: Royal Society of Chemistry journal article supplement (doi:10.1039/d3sm00891f), 2023-01-01
Supplement: d3sm00891f2.pdf [file d3sm00891f2.pdf]

## Electronic Supplementary Information for: Tunable Assembly of Host–Guest Colloidal Crystals

Tobias Dwyer,<sup>a</sup> Timothy C. Moore,<sup>a</sup> Joshua A. Anderson,<sup>b</sup> and Sharon C. Glotzer<sup>ab\*</sup>

<sup>a</sup> Department of Chemical Engineering, University of Michigan, Ann Arbor, MI, USA.

<sup>b</sup> Biointerfaces Institute, University of Michigan, Ann Arbor, MI, USA.

## Beginning of Supplementary Figures

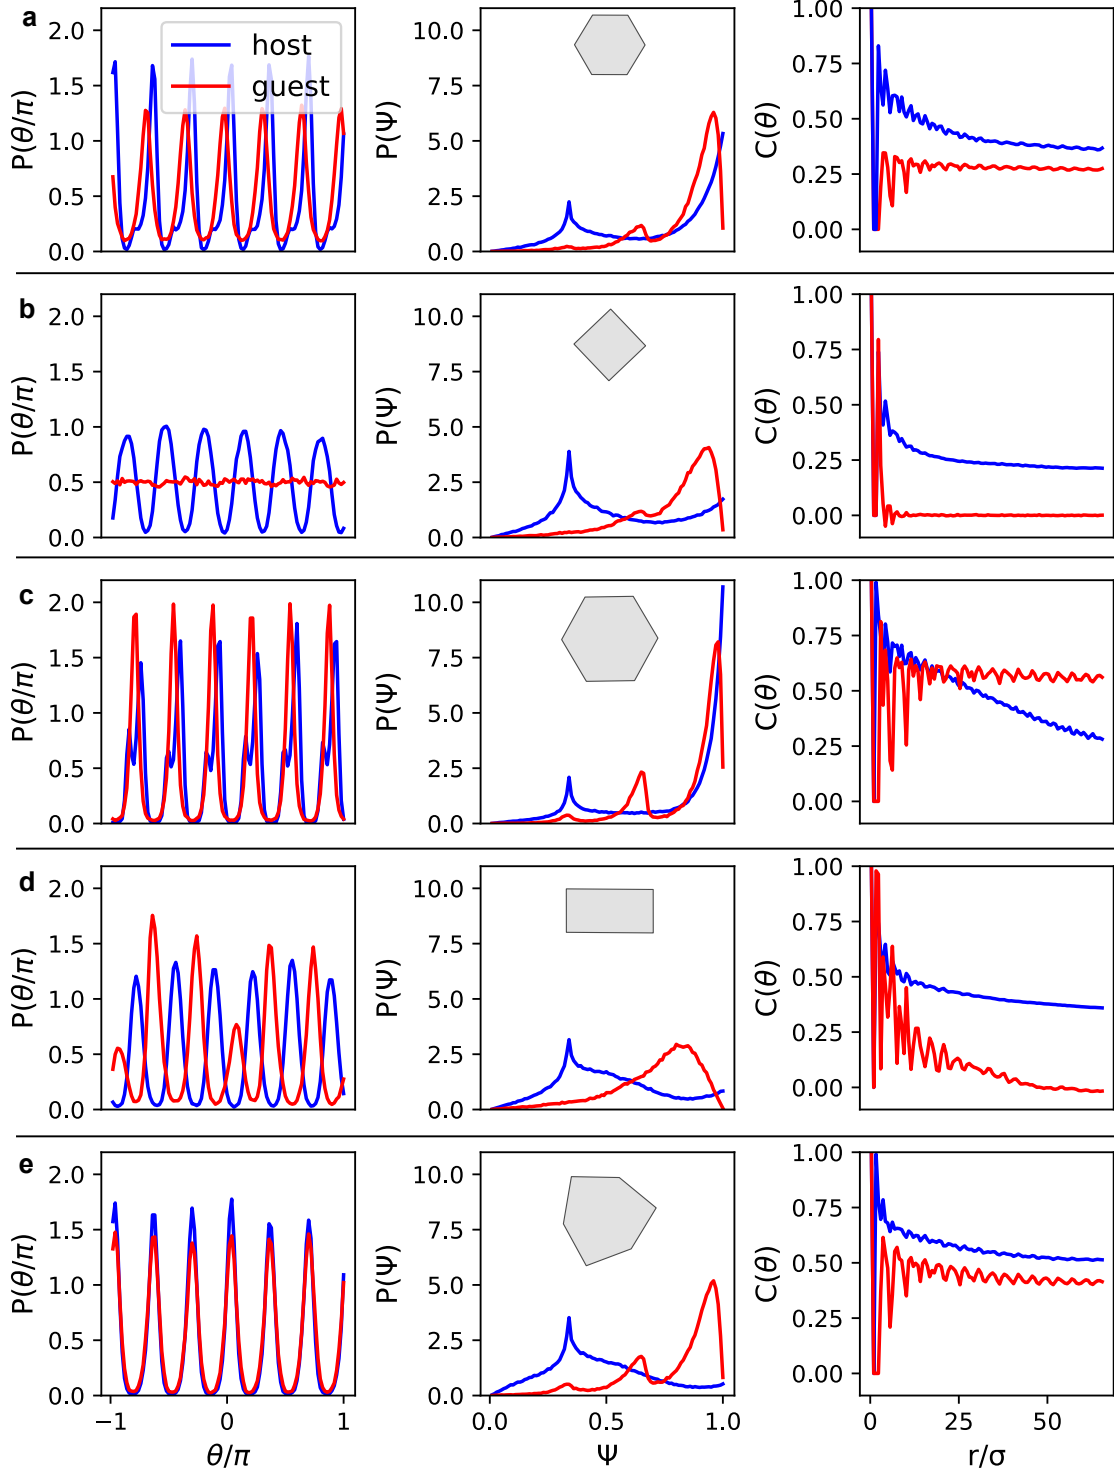

Figure S1: Structural analysis of self-assembled host-guest systems. Each row corresponds to a system with a specific guest shape shown in the inset in the middle column. Left columns: distributions of body orientations of host and guest particles for systems shown in Figs. 2 and 4 in the main text. Middle columns: distributions of the hexatic bond orientational order parameter  $\psi_j$  for host and guest particles. For the host we assumed 3 nearest neighbors and for the guests 6 nearest neighbors. Right columns: spatial correlation functions of body orientations of host and guest particles. Data for each distribution (correlation function) was collected from (averaged over) the final  $5 \times 10^6$  steps of the simulation.

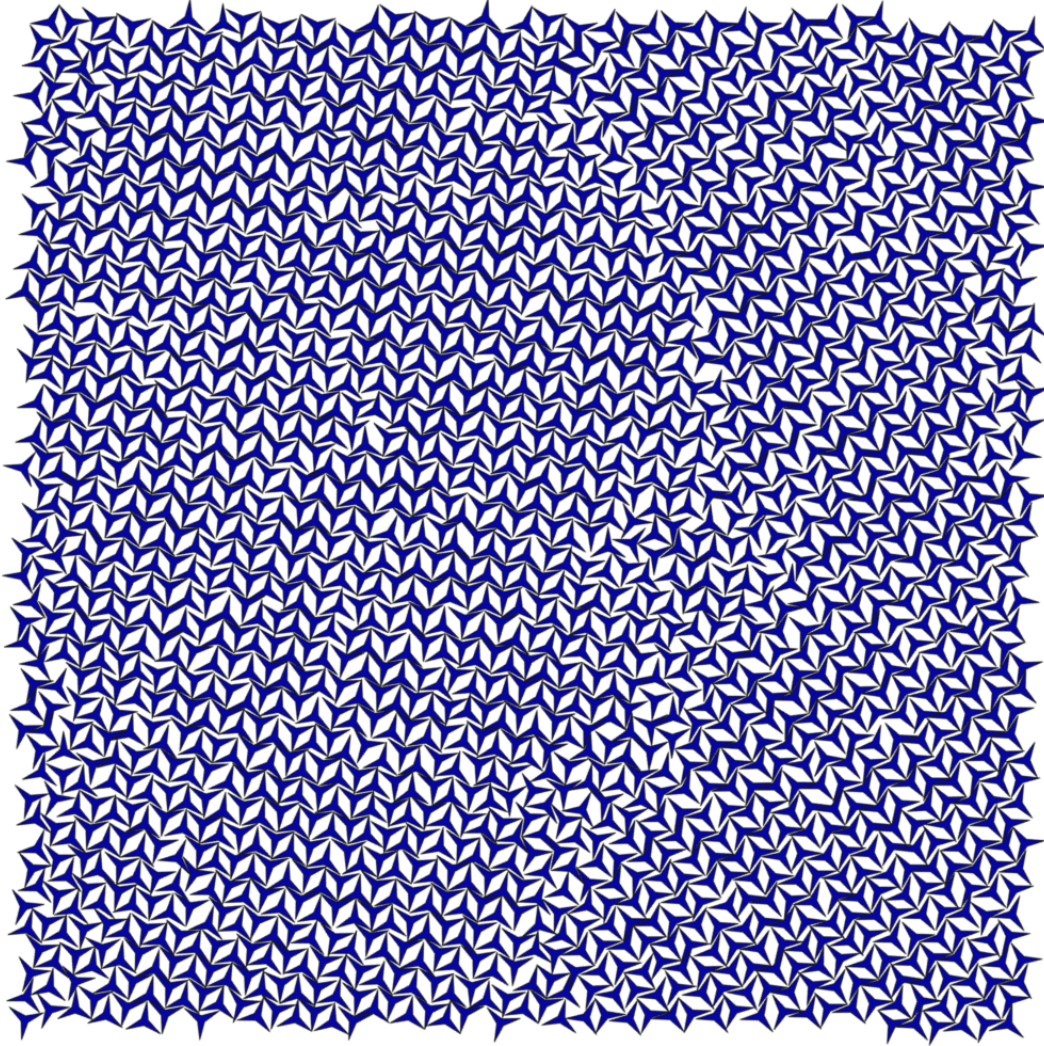

Figure S2: Snapshot of a system containing only hard star particles at  $P^* = 3.5$  showing that hexamer pores do not assemble in the absence of guest particles.

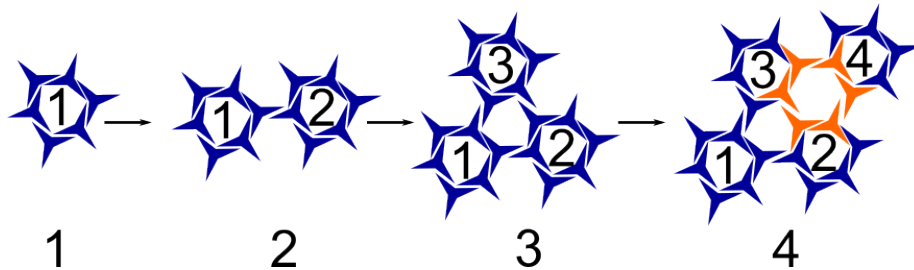

Figure S3: Tiling the plane with hexameric shield-shaped pores results in hexagon pores. To illustrate this we place a single shield pore and then add additional shield pores (number denoting the number of shield pores) with edge-edge connections that make more shield pores. Placing three shield pores in this way results in an additional emergent shield pore shown in 3. However, placing a 4th shield pore results in the emergence of a hexagon pore, indicating that hexamer shield pores alone cannot tile space.
